# Supplementary material for: Predicting decadal trends in cloud droplet number concentrationusing reanalysis and satellite data
Source: Copernicus journal article supplement (doi:10.5194/acp-2017-811), 2017-09-26
Supplement: Supplementary file 1 [file acp-2017-811-supplement.pdf]

# Supplementary Information: Predicting decadal trends in cloud droplet number concentration using reanalysis and satellite data

Daniel T. McCoy<sup>1\*</sup>, Frida A.-M. Bender<sup>2</sup>, Daniel P. Grosvenor<sup>1</sup>, Johannes K. Mohrmann<sup>3</sup>, Dennis L. Hartmann<sup>3</sup>, Robert Wood<sup>3</sup>, Paul R. Field<sup>1,4</sup>

5 <sup>1</sup>University of Leeds, Leeds, LS2 9JT, UK, <sup>2</sup>Stockholm University, Stockholm, 114 18, Sweden

<sup>3</sup>University of Washington, Seattle, 98195, USA <sup>4</sup>MetOffice, Exeter, EX1 3PB, UK

Correspondence to: Daniel T. McCoy (d.t.mccoy@leeds.ac.uk)

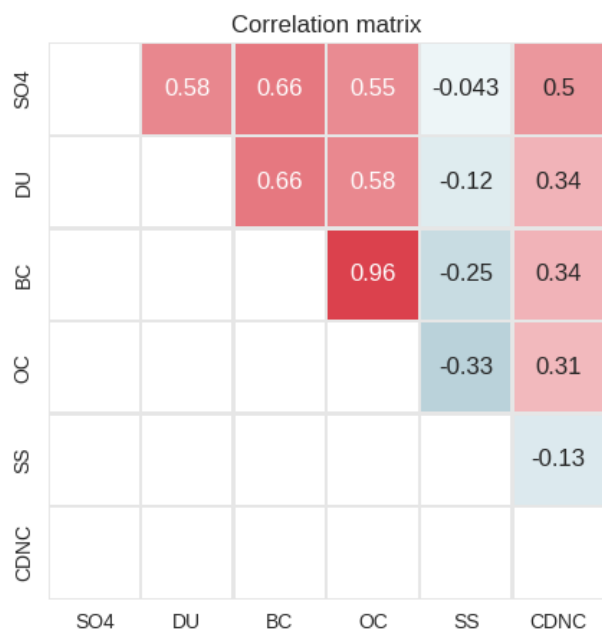

10 **Fig. S 1 Linear correlations between different predictors used in the regression analysis. Note that correlations are between the  $\log_{10}$  of each variable for consistency with the regression model.**

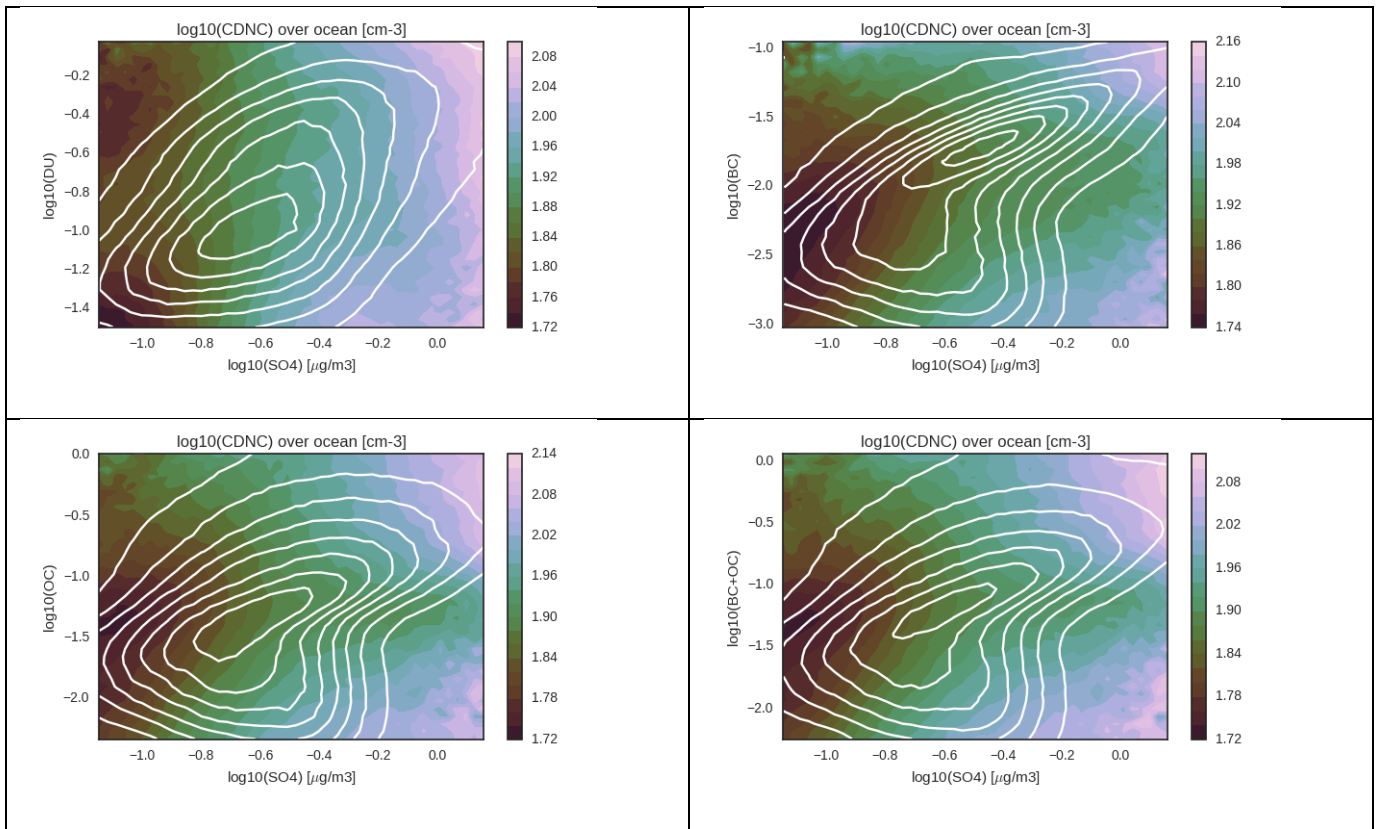

**Fig. S 2** As in Figure 4, but for dust, black carbon, organic carbon, and the sum of black and organic carbon.

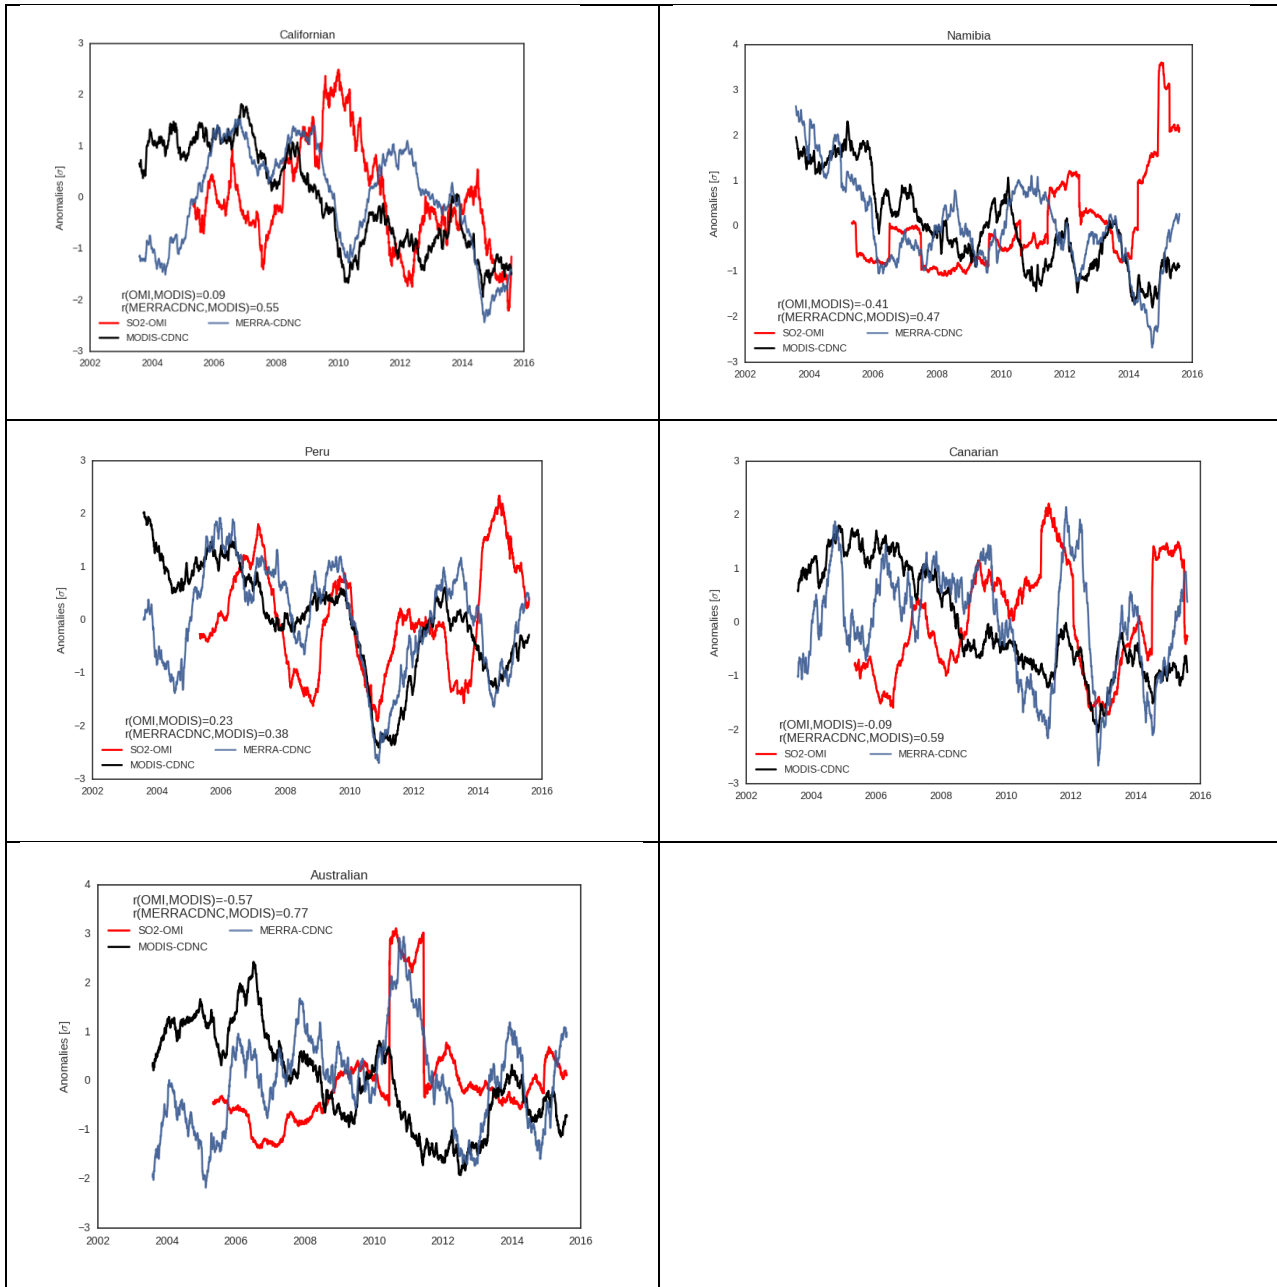

Fig. S 3 As in Figure 5, but corresponding to the stratocumulus regions.

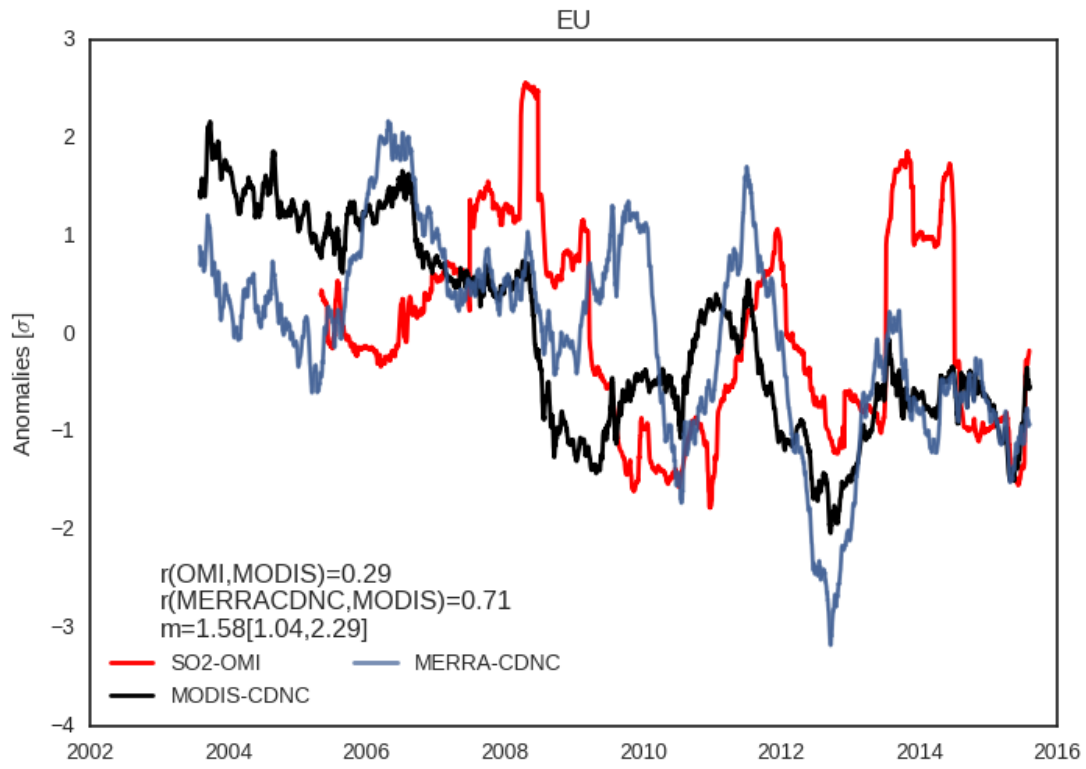

**Fig. S 4** As in Figure 5, but for the European Union region. This region corresponds to the land area 35°N-71°N, 10°W-31°E and the ocean area 35°N-71°N, 31°W-31°E.
